# Supplementary material for: Detection of quantitative trait loci for capsanthin content in pepper (Capsicum annuum L.) at different fruit ripening stages
Source: PubMed Central journal article supplement — Breed Sci. 2019 Feb 20;69(1):30–9. doi: 10.1270/jsbbs.18070 (PMC6507717; doi:10.1270/jsbbs.18070), 2019-02-20
Supplement: 69_18070_2.pdf [file 69_18070_2.pdf]

**Supplemental Table 1.** Datasets using in QTL analysis

| Dataset | Experiment | DAF       | No. of phenotype | No. of genotype |
|---------|------------|-----------|------------------|-----------------|
| 1       | 1          | 45        | 106              | 141             |
| 2       | 1          | 90        | 101              | 141             |
| 3       | 2          | 45        | 121              | 141             |
| 4       | 2          | 90        | 121              | 141             |
| 5       | 1 and 2    | 45        | 227              | 141             |
| 6       | 1 and 2    | 90        | 222              | 141             |
| 7       | 1 and 2    | 45 and 90 | 449              | 141             |
